# Supplementary material for: How consistent are top-down hydrocarbon emissions based on formaldehyde observations from GOME-2 and OMI?
Source: Copernicus journal article supplement (doi:10.5194/acp-15-11861-2015), 2015-10-26
Supplement: Supplementary file 1 [file acp-15-11861-2015-supplement.pdf]

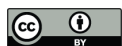

*Supplement of*

## **How consistent are top-down hydrocarbon emissions based on formaldehyde observations from GOME-2 and OMI?**

**T. Stavrakou et al.**

*Correspondence to:* T. Stavrakou (jenny@aeronomie.be)

The copyright of individual parts of the supplement might differ from the CC-BY 3.0 licence.

**Abstract.** This supplement provides a description of the oxidation mechanism of OAHC (other anthropogenic hydrocarbons) in the IMAGESv2 CTM. The mechanism is adjusted in order to reproduce the yields of HCHO from the mix of 32 higher NMVOCs. The adjustment is based on box model calculations using the semi-explicit Master Chemical Mechanism (MCMv3.2).

## 1 HCHO from anthropogenic NMVOC emissions

Based on the NMVOC speciation profile of the UK National Atmospheric Emissions Inventory (NAEI) (Goodwin et al., 2001), 49 out of the 650 considered compounds account for ca. 81% of the total UK emission. 17 of the 49 compounds are included explicitly in IMAGESv2, namely, ethane, propane, ethene, propene, acetylene, formaldehyde, acetaldehyde, propanal, benzene, toluene, xylenes, methanol, ethanol, formic acid, acetic acid, acetone, and methyl ethyl ketone. The remaining 32 species (Table S1) are taken into account through a lumped compound, OAHC (other anthropogenic hydrocarbons). The oxidation mechanism of OAHC is adjusted in order to reproduce the yields of HCHO from the mix of 32 higher NMVOCs. This adjustment is realized based on time-dependent box model calculations using the semi-explicit Master Chemical Mechanism (MCMv3.2, <http://mcm.leeds.ac.uk/MCM/>, Saunders et al. (2003); Bloss et al. (2005)).

The simulations start at 6 a.m. for a temperature of 300 K at a mid-latitude location (30°N) in June. The initial concentrations of O<sub>3</sub>, CO, and OAHC are set at 35 ppb, 200 ppb and 1 ppb, respectively. The NO<sub>2</sub> concentration is kept equal to 1 ppb since our focus is on environments dominated by anthropogenic activities. For each NMVOC, the HCHO yield is calculated after one day of simulation (short-term) and after 60 days (final). The short-term yield is defined as  $Y_{1d} = P_{1d}/C_0$ , where  $C_0$  is the initial OAHC concentration and  $P_{1d}$  is the HCHO produced after one day. The final yield is calculated as  $Y_{60d} = P_{60d}/\Delta C$ ,  $\Delta C$  being the difference between the initial and the final OAHC concentration. Whereas the final yield is most relevant for estimating the impact of a precursor VOC on the global HCHO budget, the short-term yield best reflects the impact of this compound in the vicinity of its emission region.

The calculated short-term and final molar yields are summarized in Table S1. As expected, the highest short-term yields are calculated for the most reactive precursors, namely, the higher alkenes and aromatics, with  $k_{OH}$  typically ranging between  $3 \cdot 10^{-11}$  and  $7 \cdot 10^{-11}$  cm<sup>3</sup> molec.<sup>-1</sup> s<sup>-1</sup>. For those compounds, the short-term yield and the final yield

are very close, within  $\sim 10\%$ . Exceptions are the cases of ethylbenzene, which is less reactive, and 2-methylpropene, which is oxidized to acetone, a very slow-reacting intermediate. For alkanes, alcohols and esters, the short-term yield is often much lower than the final yield, due to the relatively low reactivity of the precursor ( $k_{OH}$  between  $2 \cdot 10^{-12}$  and  $13 \cdot 10^{-12}$  cm<sup>3</sup> molec.<sup>-1</sup> s<sup>-1</sup>) and/or due to the existence of slow-reacting oxygenated intermediates.

For alkanes, the highest final yields are calculated for branched-chain structures (0.5-0.66 per carbon). The yields are slightly lower for butane and pentane (0.5 per C) and significantly lower for the longer linear alkanes ( $<0.4$  per C). Final yields range between 0.43 and 0.72 per C for alkenes, and between 0.33 and 0.35 for trimethylbenzenes.

The production of HCHO (in g) by a NMVOC can be expressed as

$$P = E \cdot Y \cdot MW_{HCHO}/MW_{NMVOC}, \quad (1)$$

with  $E$  the emission (in g),  $Y$  the calculated short-term or final molar yield and  $MW$  the molecular weight.

The emission of the lumped OAHC species being taken equal to the total emission (in g) of the explicit NMVOCs, its molecular weight is calculated using

$$MW_{OAHC} = \frac{\sum_i E_i}{\sum_i (E_i/MW_i)}, \quad (2)$$

and its short-term and final yield by

$$Y_{OAHC} = \frac{\sum_i (E_i/MW_i) \cdot Y_i}{\sum_i E_i/MW_i}. \quad (3)$$

The values obtained in this way are 73 g(HCHO)/g(OAHC) for  $MW_{OAHC}$  and 0.567 and 2.381 for the short-term and final yields, respectively.

The rate of the reaction of OAHC with OH,

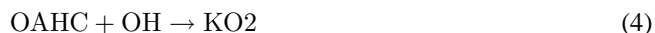

needed to reproduce those yields is relatively low ( $1.7 \cdot 10^{-12}$  cm<sup>3</sup> molec.<sup>-1</sup> s<sup>-1</sup>) based on box model calculations. The following simple mechanism is adopted :

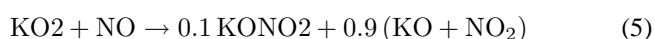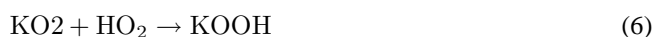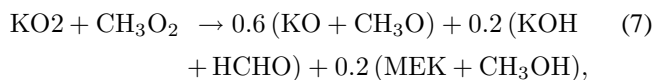

where MEK denotes methylethyl ketone, KOH is a generic higher alcohol and the oxy radical (KO) reacts immediately

:

following

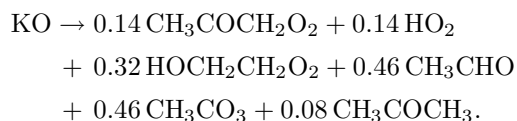

Both KONO2 and KOOH photolyze (to KO + NO<sub>2</sub> and KO + OH, respectively) and react with OH :

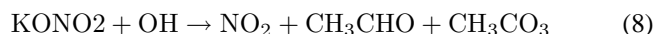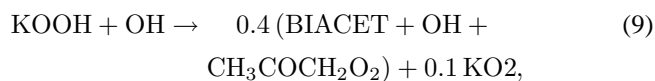

where BIACET denotes biacetyl (CH<sub>3</sub>COCOCH<sub>3</sub>). The kinetic rates are  $k_5 = 2.54 \cdot 10^{-12} \exp(360/T)$ ,  $k_6 = 1.82 \cdot 10^{-13} \exp(1300/T)$ ,  $k_7 = 3.8 \cdot 10^{-13}$ ,  $k_8 = 10^{-12}$ , and  $k_9 = 3.9 \cdot 10^{-11}$  (in cm<sup>3</sup> molec.<sup>-1</sup> s<sup>-1</sup>), where  $T$  denotes the temperature.

## References

- Bloss, C., V. Wagner, A. Bonzanini, M. E. Jenkin, K. Wirtz, M. Martin-Reviejo, and M. J. Pilling: Evaluation of detailed aromatic mechanisms (MCMv3 and MCMv3.1) against environmental chamber data, *Atmos. Chem. Phys.*, 5, 623–639, 2005.
- Goodwin, J. W. L., A. G. Salway, T. P. Murrells, C. J. Dore, N. R. Passant, K. R. King, P. J. Coleman, M. M. Hobson, S. T. Pye, J. D. Watterson: UK Emissions of air pollutants 1970-1999, National Atmospheric Emissions Inventory Report, AEAT/ENV/R/0798, ISBN 1-85580-031 4., 2001, <http://uk-air.defra.gov.uk/reports/empire/naei/annreport/annrep99/appdx6.pdf>.
- Saunders, S. M., M. E. Jenkin, R. G. Derwent, and M. J. Pilling: Protocol for the development of the Master Chemical Mechanism, MCM v3 (Part A): tropospheric degradation of nonaromatic volatile organic compounds, *Atmos. Chem. Phys.*, 3, 161–180, 2003.

**Table S1.** MCMv3.2-based short-term yields (after 1 day) and final yields (after 60 days) of HCHO from the oxidation of NMVOCs not explicitly considered in the IMAGES mechanism. The OH-reaction rates at 298 K and the estimated emissions for the UK (Goodwin et al., 2001) are also provided.

|                  | NMVOC                  | Molecular weight | $Y_{1d}$<br>mol/mol | $Y_{60d}$<br>mol/mol  | OH-reaction rate<br>$\text{cm}^3 \text{molec.}^{-1} \text{s}^{-1}$ | Emission<br>kt/yr |
|------------------|------------------------|------------------|---------------------|-----------------------|--------------------------------------------------------------------|-------------------|
| Higher alkanes   | butane                 | 58               | 0.280               | 2.033                 | $2.35 \cdot 10^{-12}$                                              | 151.11            |
|                  | pentane                | 72               | 0.600               | 2.098                 | $4.00 \cdot 10^{-12}$                                              | 64.53             |
|                  | hexane                 | 86               | 0.624               | 2.805                 | $5.45 \cdot 10^{-12}$                                              | 51.46             |
|                  | heptane                | 100              | 0.520               | 2.952                 | $7.02 \cdot 10^{-12}$                                              | 22.49             |
|                  | octane                 | 114              | 0.505               | 2.976                 | $8.70 \cdot 10^{-12}$                                              | 15.08             |
|                  | nonane                 | 128              | 0.541               | 3.128                 | $9.98 \cdot 10^{-12}$                                              | 6.03              |
|                  | decane                 | 142              | 0.607               | 3.826                 | $1.12 \cdot 10^{-11}$                                              | 11.04             |
|                  | undecane               | 156              | 0.717               | 4.339                 | $1.29 \cdot 10^{-11}$                                              | 4.87              |
|                  | 2-methylpropane        | 58               | 0.308               | 2.710                 | $2.18 \cdot 10^{-12}$                                              | 40.92             |
|                  | 2-methylbutane         | 72               | 0.361               | 2.810                 | $3.70 \cdot 10^{-12}$                                              | 70.18             |
|                  | 2-methylpentane        | 86               | 0.530               | 2.914                 | $5.30 \cdot 10^{-12}$                                              | 5.73              |
|                  | 3-methylpentane        | 86               | 0.683               | 2.994                 | $5.40 \cdot 10^{-12}$                                              | 3.96              |
|                  | 2-methylhexane         | 100              | 0.525               | 3.814                 | $6.86 \cdot 10^{-12}$                                              | 5.36              |
|                  | 3-methylhexane         | 100              | 0.670               | 3.283                 | $7.15 \cdot 10^{-12}$                                              | 4.38              |
| cyclohexane      | 86                     | 0.541            | 1.615               | $7.20 \cdot 10^{-12}$ | 4.31                                                               |                   |
| Higher alkenes   | 1-butene               | 56               | 1.790               | 1.911                 | $3.14 \cdot 10^{-11}$                                              | 4.15              |
|                  | 2-methylpropene        | 56               | 1.117               | 2.890                 | $5.11 \cdot 10^{-11}$                                              | 11.37             |
|                  | 1-pentene              | 70               | 1.852               | 2.157                 | $3.14 \cdot 10^{-11}$                                              | 3.81              |
|                  | 1.3-butadiene          | 54               | 1.644               | 1.711                 | $6.65 \cdot 10^{-11}$                                              | 6.19              |
| Higher aromatics | ethylbenzene           | 106              | 0.533               | 1.111                 | $7.00 \cdot 10^{-12}$                                              | 18.48             |
|                  | 1.2.3-trimethylbenzene | 120              | 2.883               | 3.189                 | $3.27 \cdot 10^{-11}$                                              | 5.01              |
|                  | 1.2.4-trimethylbenzene | 120              | 2.758               | 2.999                 | $3.25 \cdot 10^{-11}$                                              | 18.45             |
|                  | 1.3.5-trimethylbenzene | 120              | 2.554               | 2.969                 | $5.67 \cdot 10^{-11}$                                              | 6.75              |
|                  | styrene                | 104              | 0.942               | 0.987                 | $5.80 \cdot 10^{-11}$                                              | 4.14              |
| Others           | 1-propanol             | 60               | 0.949               | 1.476                 | $5.82 \cdot 10^{-12}$                                              | 4.79              |
|                  | 2-propanol             | 60               | 0.192               | 1.935                 | $5.09 \cdot 10^{-12}$                                              | 8.44              |
|                  | 1-butanol              | 74               | 1.166               | 1.728                 | $8.48 \cdot 10^{-12}$                                              | 5.63              |
|                  | 2-butanol              | 74               | 0.683               | 2.099                 | $8.70 \cdot 10^{-12}$                                              | 4.05              |
|                  | methyl acetate         | 74               | 0.115               | 1.661                 | $3.49 \cdot 10^{-13}$                                              | 4.66              |
|                  | ethyl acetate          | 88               | 0.462               | 1.823                 | $1.68 \cdot 10^{-12}$                                              | 13.72             |
|                  | butyl acetate          | 116              | 0.615               | 2.469                 | $4.92 \cdot 10^{-12}$                                              | 6.88              |
|                  | 4-methyl-2-pentanone   | 100              | 1.770               | 3.759                 | $1.41 \cdot 10^{-11}$                                              | 11.73             |
